# Supplementary material for: Hypertension care cascade in the Ingwavuma rural community, uMkhanyakude District, KwaZulu-Natal province of South Africa
Source: PubMed Central journal article supplement (PMC8590801; doi:10.7717/peerj.12372), 2021-11-11
Supplement: peerj-09-12372-s002.pdf [file peerj-09-12372-s002.pdf]

**STUDY TITLE: PREVALENCE, AWARENESS, HEALTHCARE UTILIZATION AND BURDEN OF CARDIOVASCULAR DISEASE AND ITS RISK FACTORS IN INGWAVUMA, KWAZULU-NATAL**

**INDIVIDUAL QUESTIONNAIRE**

Igama lalocwaningayo .....

Isuku lokucwaninga (device date).....

Isikhathi sokuqala ucwaningo (device time).....

**Isingeniso:** Igama lami nginguHerbert Chikafu, ngiyinxenye yeqembu labacwaningi abavakashele indawo yaseNgwavuma, ukuze sixoxe nabantu besazise ngemibono, ulwazi lwabo kanye nokuxwayiseka mayelana nezifo, isifo senhliziyo, ukukhuluphala okwendlulele, umfutho wegazi ophezulu, kanye nesifo sikashukela esesifike esitejini sesibili.

**Inhloso yalolucwaningo:** ukuhlola ulwazi, imibuzo kanye nendlela yokuziphatha yabantu endaweni yaseNgwavuma mayelana nezifo ezifana noshukela owedlulele kanye nomfutho wegazi ophezulu. Lolulwazi luzosiza ukuthuthukisa ezokuphepha kulendawo kanye nokufundiswa kwabantu ngalezizifo ikakhulukazi isifo senhliziyo kanye nezimbangela zalesisifo. Ngalolulwazi kuzosizakala indawo yaseNgwavuma kanye nezinye izindawo zaseNingizimu Afrika. Isifo senhliziyo sibalelwa kwezinye eziholayo ekubeni yimbangela yokwehlukunyezwa kanye nokufa ebantwini baseNingizimu Afrika nakwamanye amazwe asakhula. Ngakhoke ukuba yingxenye yalocwaningo kungasisiza kakhulu futhi singabonga.

**Imfihlo nemvume:** Kunemibuzo engizoyibuza kumuntu ngamunye, imibuzo efana nayo abanye abantu bayesaba ukuyiphendula kepha ningethuki amagama enu angeke ngiwabhale phansi uma ngikubuza. Angeke futhi ngiwaqhathanise neminingwane eningitshelwa yona. Awuphoqiwe ukuphendula imibuzo ongathandi ukuyiphendula, kanti nalengxoxo ungayimisa nanoma yinini uma usozizwa sewenele. Kodwake ukwethembeka kwakho uma uphendula imibuzo kuzosisiza kube sazi ukuthi abantu bacabangani ngalezifo, esenhliziyo, esikashukela, umfutho wegazi ophezu kanye nokukhuluphala okwendlulele.

Singathokoza kakhulu ukuba nawe njengengxenye yalengxoxo. Kungathatha imizuzu engu (45) kuya ehoreni elilodwa (1hr) ukubuza imibuzo. Ungathanda ukuba yingxenye?

|       |                          |
|-------|--------------------------|
| Yebo: | <input type="checkbox"/> |
| Cha:  | <input type="checkbox"/> |

.....

Isignesha

## SECTION A: INTERVIEW DETAILS AND BACKGROUND CHARACTERISTICS

| Inombolo | Imibuzo                                                                  | Izimpendulo                                                                                                                                                   |
|----------|--------------------------------------------------------------------------|---------------------------------------------------------------------------------------------------------------------------------------------------------------|
| A1       | Igama lalobuzwayo                                                        |                                                                                                                                                               |
| A2       | Ubulili balobuzwayo                                                      |                                                                                                                                                               |
| A3       | Usuku lokuzalwa (Veza umasizi)                                           |                                                                                                                                                               |
| A4       | Iminyaka yobuzwayo (uma engenawo umazisi<br>cela ikhadi lasemtholampilo) |                                                                                                                                                               |
| A5       | Igama lendawo                                                            |                                                                                                                                                               |
| A6       | Igama lesigodi                                                           |                                                                                                                                                               |
| A7       | Iwadi                                                                    |                                                                                                                                                               |
| A8       | Inombolo yomuzi (beka Inombolo yomuzi<br>ekhadini lamaleveva)            |                                                                                                                                                               |
| A9       | Inombolo yocingo                                                         |                                                                                                                                                               |
| A10      | Imininingwane yokushada                                                  | Angishadile 0<br>Ngishadile 1<br>Ngihlalisene nomunye 2<br>Sehlukano somshado 3<br>Ngingumfelokazi 4                                                          |
| A11      | Ingabe usuke wasifunda isikole?                                          | Cha 0<br>Yebo 1                                                                                                                                               |
| A12      | Wagcine kuliphi ibanga kwezemfundo (khethe<br>okukudwa)                  | Emabangeni aphantsi 0<br>Ebanganeni eliphezulu 1<br>Ekolishi 2<br>Ngaphezukwelikoshi 3                                                                        |
| A13      | Ukhona umsebenzi owenzayo                                                | Ngingumfundi 0<br>Ngiyazisebenza 1<br>Ngisebenza ngaphansi<br>kukahulumeni 2<br>Ngisebenzela inkapani ezimele 3<br>Angisebenzi 4<br>Ngathatha umhlalaphansi 5 |
| A14      | Bangaki abantu abasebenzayo endlini yakwenu?                             | Bhala Inombolo                                                                                                                                                |
| A15      | Ingabe ikhona imali yesibonelelo oyitholayo<br>kuhulumeni?               | Cha 0<br>Yebo 1                                                                                                                                               |

|     |                                                         |                                                          |
|-----|---------------------------------------------------------|----------------------------------------------------------|
| A16 | Ngaphandle kwakho bangaki abantu bakini abahola igrant? | Bhala Inombolo                                           |
| A17 | Usuhlale isikhathi esingakanani kulendawo?              | Inombolo yeminyaka    _ _ <br>Inombolo yezinyanga    _ _ |

## B. IMBUZO NGEZEMPILO

| Inombolo | Imibuzo                                                                                    | Izimpendulo                                                                                                        |
|----------|--------------------------------------------------------------------------------------------|--------------------------------------------------------------------------------------------------------------------|
| B1       | Ujwayele ukulutholaphi usizo lwezempilo?                                                   | Umtholampilo mphakathi   0<br>Umtholampilo ozimele   1<br>Ikhemisi elizimele   2<br>Umthandazi   3<br>Inyanga   4  |
| B2       | Uke uhluleke ukufuna usizo lwezokuphepha uma uzizwa ugula?                                 | Cha   0<br>Yebo   1                                                                                                |
| B3       | Bala izizathu ezenza ungayi esibhendlela/ emtholampilo uma ugula                           | Zibale                                                                                                             |
| B4       | Iziphi zona izifo ezihlasele kakhulu kulendawo?                                            | Zibale                                                                                                             |
| B5       | Iziphi izifo ezibulala kakhulu abantu bakulendawo?                                         | Zibale                                                                                                             |
| B6       | Usuke wezwa ngesifo senhliziyo nemithambo yegazi?                                          | Cha   0<br>Yebo   1                                                                                                |
| B7       | Uyazazi izinto ezidalela ekubeni nesifo senhliziyo nemithambo yegazi?                      | Cha   0<br>Yebo   1<br><b>If No skip to B9</b>                                                                     |
| B8       | Ungazibala izinto eziholela ekubeni nesifo senhliziyo?                                     | Zibale                                                                                                             |
| B9       | Ingabe zikhona izindlela zokunciphisa amathuba okuba nesifo senhliziyo nemithambo yegazi?  | Cha   0<br>Yebo   1                                                                                                |
| B10      | Ungazibala izindlela zokwehlisa amathuba okuphathwa yisifo senhliziyo nemithambo yegazi?   | Zibale                                                                                                             |
| B11      | Abantu abaneminyaka emingaki abasengozini yokuphathwa yisifo senhliziyo nemithambo yegazi? | 18 – 30 iminyaka   1<br>30 – 40 iminyaka   2<br>40 – 50 iminyaka   3<br>Ngaphezu kwengu 50   4<br>Bonke abantu   5 |

### C. UGWAYI

| Sengizobuza imibuzo mayelane Chakubhenywa kukagwayi |                                                                                                            |                                                                                        |
|-----------------------------------------------------|------------------------------------------------------------------------------------------------------------|----------------------------------------------------------------------------------------|
| Inombolo                                            | Imibuzo                                                                                                    | Izimpendulo                                                                            |
| C1                                                  | Ingabe lukhona uhlobo lukagwayi olubhemayo (imboza, inqawe)?                                               | Cha 0<br>Yebo 1<br><b>Uma kungucha welela c8</b>                                       |
| C2                                                  | Ingabe ubhema nsuku zonke?                                                                                 | Cha 0<br>Yebo 1                                                                        |
| C3                                                  | Waqala uneminyaka emingaki ukubhema?                                                                       | Bhala iminyaka<br>Angazi                                                               |
| C4                                                  | Mawungalinganisa isibalo sezinhlobo zogwayi ozibhema ngosuku zingaki?                                      | Bhala inombolo yo:<br>Gwayi othengiwe<br>Gwayi wekuzigocela<br>Gwayi wenqawe<br>Okunye |
| C5                                                  | Ezinyangeni ezilinganiselwe onyakeni ezendlule usuke wazama ukuyeka ugwayi?                                | Cha 0<br>Yebo 1                                                                        |
| C6                                                  | Uke wavakashela udokotela noma umsizi wezempilo ezinyangeni ezilingene unyaka ezindlulile?                 | Cha 0<br>Yebo 1                                                                        |
| C7                                                  | Ngenkathi uvakashele umtholampilo bakwexwayisa yini ukuba uyeke ugwayi?                                    | Cha 0<br>Yebo 1                                                                        |
| C8                                                  | Ngenkathi endlule wake wawubhema ugwayi?                                                                   | Cha 0<br>Yebo 1<br><b>Uma kungucha welela C12</b>                                      |
| C9                                                  | Enkathini endlule ububhema nsuku zonke?                                                                    | Cha 0<br>Yebo 1                                                                        |
| C10                                                 | Wayeka unemnyaka emingaki ukubhema?                                                                        | Bhala iminyaka<br>Angazi 9                                                             |
| C11                                                 | Usuqede isikhathi esingakanani wayeka ukubhema?                                                            | Iminyaka<br>Izinyanga<br>Amaviki<br>Angazi 9                                           |
| C12                                                 | Ingabe njengamanje uyayisebenzisa into esagwayi kepha enganantuthu (efana nesinemfu / ugwayi ohlafunwayo)? | Cha 0<br>Yebo 1                                                                        |
| C13                                                 | Ucabanga ukuthi ukubhema ugwayi kungasidala isifo esingelapheki noma okungakhulumeki ngaso?                | Cha 0<br>Yebo 1<br><b>Uma kungucha welela D1</b>                                       |
| C14                                                 | Yiziphi izifo ezingelapheki ezidalwa ukubhema ugwayi?                                                      | Zibale                                                                                 |

#### D. UKUPHUZA KWAMANZI AMPONJWANA

| Ngizokubuza imibuzo ephatheleni nokuphuzwa kwamanzi amponjwana |                                                                                                                    |                                                                                                                            |
|----------------------------------------------------------------|--------------------------------------------------------------------------------------------------------------------|----------------------------------------------------------------------------------------------------------------------------|
| Inombolo                                                       | Imibuzo                                                                                                            | Izimpendulo                                                                                                                |
| D1                                                             | Uke waphuza utshwala obufana nobhiya newayini?                                                                     | Cha 0<br>Yebo 1<br><b>Uma kungucha welela ku E1</b>                                                                        |
| D2                                                             | Waphuza uhlobo olunjani lotshwala?                                                                                 | Ubhiya 0<br>Yiwayini 1<br>ugologo 2<br>Umqombothi 3<br>Nalezinye 4                                                         |
| D3                                                             | Usuke waphuza utshwala ezinyangeni ezingange shumi nambili yezedlulile?                                            | Cha 0<br>Yebo 1<br><b>Uma kungucha welela ku E1</b>                                                                        |
| D4                                                             | Uke wayeke ukuphuza ngezizathu eziphathelene nokugula noma ngenxa yezaluleko ezibuya kudokotela noma umhlengikazi? | Cha 0<br>Yebo 1                                                                                                            |
| D5                                                             | Ezinyangeni ezingangelishumi nambili, uphuze kangaki iziphuzo ezinotshwala?                                        | Nsuku zonke 0<br>5-6 izinsuku ngesonto 1<br>3-4 izinsuko ngesonto 2<br>1-2 izinsuko ngesonto 3<br>1-3 izinsuko ngenyanga 4 |
| D6                                                             | Usuke waphuza enyangeni endlule?                                                                                   | Cha 0<br>Yebo 1<br><b>Uma kungucha welela ku D12</b>                                                                       |
| D7                                                             | Kulenyanga endlule ubuphuza kangakanani?                                                                           | Bhala inombolo<br>Angazi 9                                                                                                 |
| D8                                                             | Utshwala ngabunye ezihlobeni ozijwayele, ubuphuza kangaki kulenyanga eyedlule?                                     | Bhala inombolo<br>Angazi 9                                                                                                 |
| D9                                                             | Ithini inombolo enkulu kunazo zonke yotshwala oke wabuphuza emcimbini uwodwa kulenyanga endlule?                   | Bhala inombolo<br>Angazi 9                                                                                                 |
| D10                                                            | Kulenyanga eyedlule uke waphuza utshwala obulinganiselwe esithupheni noma ngaphezulu ngosuku oluladwa kangaki?     | Bhala inombolo<br>Angazi 9                                                                                                 |

|     |                                                                                                 |                                                                                                                               |
|-----|-------------------------------------------------------------------------------------------------|-------------------------------------------------------------------------------------------------------------------------------|
| D11 | Ezinsukwini eziyisikhombisa ezendlule uke waphuza utshwala obungakanani ngezinhlobo zabo?       | Bhala inombolo ngosuku<br>Msumbuluko 0<br>Lwesibili 1<br>Lwesithathu 2<br>Lwesine 3<br>Lesihlanu 4<br>Umgqibelo 5<br>Isonto 6 |
| D12 | Onyakeni owedlule uzame wehluleka kangaki ukuyeka utshwala?                                     | Angazi 0<br>Kaningi 1<br>Kamubalwa 2                                                                                          |
| D13 | Enyakeni owedlule ubudinge kangaki utshwala bokuqeda ibhabhalaza emva kokulalala uphuze kakhulu | Akaze 0<br>Cishe kube nsuku zonke 1<br>Njalo ngenyanga 2<br>kungaphansi kwenyanga<br>Njalo ngeviki                            |
| D14 | Usuke wayeka ukuphuza?                                                                          | Cha 0<br>Yebo 1<br><b>Uma kunguCha welela ku E1</b>                                                                           |
| D15 | Yini eyenza uyeke ukuphuza?                                                                     | Zibale                                                                                                                        |

## E. UKUDLA KWEMPILO

| Sengizobuza imibuzo ephathelene nezakhamzimba (Ukudla) |                                              |                                                     |
|--------------------------------------------------------|----------------------------------------------|-----------------------------------------------------|
| Inombolo                                               | Imibuzo                                      | Izimpendulo                                         |
| E1                                                     | Uyazidla izithelo                            | Cha 0<br>Yebo<br>uma kunguCha welela ku <b>F1</b>   |
| E2                                                     | Evikini uzidla kangaki izithelo?             | Bhala inombolo<br>Angazi 9                          |
| E3                                                     | Ngosuku ujwayele ukudla izithelo ezinganani? | Bhala inombolo<br>Angazi 9                          |
| E4                                                     | Uyayidla imifino?                            | Cha 0<br>Yebo 1<br><b>Uma kunguCha welela ku F1</b> |
| E5                                                     | Evikini, uzidla kangaki izitshalo/amaveji?   | Bhala inombolo<br>Angazi 9                          |
| E6                                                     | Udla inani elingakanani lamaveji ngosuku?    | Kancane 0<br>Kakhulu 1<br>Okulingene 2              |

## F. USAWOTI WOKUDLA

Ngale mibuzo elandelayo, sithanda ukuzwa kabanzi mayelana nosawoti/notswayi ekhudleni kwako. I-Dietary salt ikhuluma ngalo lonke uhlobo lukasawoti, usawoti omahadladladla, usawoti o-iodized, amaqhezu estock, nosawoti owupowda, kanjalo namasosi anosawoti. Lemibuzo ingokufaka usawoti ekudleni ngaphambi kokudla, nasekutheni ukudla ukwenza kanjano kwakho, ekudleni okukhiqiziwe okunosawoti omningi njengama chips, amazambane athosiwe, kanjalonokulawula indlela ofaka ngayo usawoti. Ngicela uphendule le mibuzo ngisho noma ngabe wena uwudla ndendlela usawoti.

| Inombolo | Imibuzo                                                                                                                                                            | Izimpendulo                                                                                  |
|----------|--------------------------------------------------------------------------------------------------------------------------------------------------------------------|----------------------------------------------------------------------------------------------|
| F1       | Uwufaka kangaki usawoti noma isombo elinosawoti ngaphimbi kokudla noma uma udla?                                                                                   | Angifaki 0<br>Ngalesinye isikhathi 1<br>Sonke sikhathi 2                                     |
| F2       | Uzisebenzisa kangaki izonongo ezinosawoti, ezifana no-Aromat, iknorrox, uma upheka?                                                                                | Angifaki 0<br>Ngalesinye isikhathi 1<br>Sonke sikhathi 2                                     |
| F3       | Ukudla kangaki ukudla okugcinwe ngosawoti ukuze kungaboli ukudla okufana nofishi wethini, oshizi, ubhekeni, kanye nokudla kwase zitolo ezidayisa ukudla okuphekiwe | Angifaki 0<br>Ngalesinye isikhathi 1<br>Sonke sikhathi 2                                     |
| F4       | Ufaka izinandisi ezinosawoti ezingakanani ekudleni?                                                                                                                | Ezincane kakhulu 0<br>Ezincane 1<br>Isikalo esilingene 2<br>Eziningi 3<br>Eziningi kakhulu 4 |
| F5       | Ingabe kubaluleke kanganani ukwehlisa usawoti?                                                                                                                     | Akubaluleki neze 0<br>Khona kubalulekile 1<br>Kubaluleke kakhulu 2<br>Angazi 9               |
| F6       | Ucabanga ukuthi ukudla okunosawoti kakhulu kungakubangela izifo?                                                                                                   | Cha 0<br>Yebo 1<br>Angazi 9                                                                  |

|     |                                                                     | <b>Uma kunguCha welela ku F8</b> |
|-----|---------------------------------------------------------------------|----------------------------------|
| F7  | Uma ukhethe uyebo, yiziphi lezifo ezingakuphatha?                   | Zibale                           |
| F8  | Uyazikhethela ukuthenga ukudla okugcinwe ngasowoti ukuze kungaboli? | Cha 0<br>Yebo 1                  |
| F9  | Uyalibheka izinga lasawoti ekudleni uma ukuthenga?                  | Cha 0<br>Yebo 1                  |
| F10 | Uyakuthenga ukudla okunosawoti omuncane?                            | Cha 0<br>Yebo 1                  |
| F11 | Uyazisebenzisa izinongo ezinganasawoti uma upheka?                  | Cha 0<br>Yebo 1                  |
| F12 | Uyakugwema ukudla okuphekwe ezitolo?                                | Cha 0<br>Yebo 1                  |
| F13 | Kukhona okwenzayo ukuze ulawule izingo losawoti emzimbeni?          | Cha 0<br>Yebo 1                  |
| F14 | Iziphi lezozinto ozenzayo?                                          | Zibale                           |

## G. UMSEBENZI WOMZIMBA

| Okulandelayo ngizobuza mayelana ngemisebenzi oyenza ngomzimba wakho. Lemisebenzi ifana nokuzihambela ebaleni, ukugijima(ukuzivocavoca) kanye nokwenza umsebenzi wansu zonke ekhaya efana nokupheka, nokushanela, nokuwasha, kanye nokunye okuningi okwenza ngomzimba wakho okukukwenza uhefuzela noma inhliziyo ishaye phezulu. |                                                                                                                                                                                                                     |                                                     |
|---------------------------------------------------------------------------------------------------------------------------------------------------------------------------------------------------------------------------------------------------------------------------------------------------------------------------------|---------------------------------------------------------------------------------------------------------------------------------------------------------------------------------------------------------------------|-----------------------------------------------------|
| <b>Inombolo</b>                                                                                                                                                                                                                                                                                                                 | <b>Imibuzo</b>                                                                                                                                                                                                      | <b>Izimpendulo</b>                                  |
| G1                                                                                                                                                                                                                                                                                                                              | Ingabe imisebenzi yakho ibala nokugubha imigodi, ukuphakamisa izinto ezisindayo kanye nokusebenza ezinkontileleni imizuzu edlule ulelishumu, okuze kwenze inhliziyo ishaye ngamandla kanye nokuphefumulela phezulu. | Cha 0<br>Yebo 1<br><b>Uma kunguCha welela ku G5</b> |
| G2                                                                                                                                                                                                                                                                                                                              | Lemisebenzi uyenza kangaki evikini?                                                                                                                                                                                 | Bala                                                |
| G3                                                                                                                                                                                                                                                                                                                              | Uchitha isikhathi esinganani wenza lemisebenzi?                                                                                                                                                                     | Amahora --<br>Imizuzu --                            |
| G4                                                                                                                                                                                                                                                                                                                              | Ingabe imisebenzi oyenzayo ayibali kusebenza okunganyakazisa inhliziyo nokuhefuzela okwedlula imizuzu elishumi?                                                                                                     | Cha 0<br>Yebo 1                                     |
| G5                                                                                                                                                                                                                                                                                                                              | Evikini uyenza kangakanana imisebenzi engakunyakazisa kakhulu?                                                                                                                                                      | Bhala izinsuku                                      |
| G6                                                                                                                                                                                                                                                                                                                              | Uchitha isikhathi esinganani wenza imisebenzi engakhathazi emsebenzini?                                                                                                                                             | Amahora --<br>Imizuzu --                            |



| <b>Ukuya nokubuya ezindaweni</b>                                                                                                                                                                                                  |                                                                                                   |                                                  |          |
|-----------------------------------------------------------------------------------------------------------------------------------------------------------------------------------------------------------------------------------|---------------------------------------------------------------------------------------------------|--------------------------------------------------|----------|
| Lemibuzo elandelayo imayelana nokuhamba nokubuya ezindaweni isibonelo, ukuyothenga ukuya emsebenzini njalonzalo                                                                                                                   |                                                                                                   |                                                  |          |
| G7                                                                                                                                                                                                                                | Uyahamba noma uyagibela ibhayisikili ukuze uye ezindaweni isikhathi esidlule emizuzwini elishumi? | Cha<br>Yebo                                      | 0<br>1   |
| G8                                                                                                                                                                                                                                | Ujwayela ukuhamba kangaki noma kugibela kangaki ibhayisikili evikini?                             | Bhala inombolo                                   |          |
| G9                                                                                                                                                                                                                                | Uthatha isikhathi esinganani uhamba ngeziyawo noma ngebhayisikili osukwini?                       | Amahora<br>Imizuzu                               | --<br>-- |
| <b>Ukuzivocavoca</b>                                                                                                                                                                                                              |                                                                                                   |                                                  |          |
| Lemibuzo elandayo imayelana nezokuzivocavoca kwezemidlalo                                                                                                                                                                         |                                                                                                   |                                                  |          |
| G10                                                                                                                                                                                                                               | Uyayidlala imidlalo?                                                                              | Cha<br>Yebo<br><b>Uma kunguCha welela ku G15</b> | 0<br>1   |
| G11                                                                                                                                                                                                                               | Bala imidlalo oyenzayo?                                                                           | Zibale                                           |          |
| G12                                                                                                                                                                                                                               | Ingabe lomdlalo owenzayo uthatha amandla amangakanani                                             | Amandla amancane<br>Amandla amaningi             | 0<br>1   |
| G13                                                                                                                                                                                                                               | Lemidlalo uyenza isikhathi esinganani evikini?                                                    | Faka inombolo yezinsuku --                       |          |
| G14                                                                                                                                                                                                                               | Osukwini uthatha isikhathi esinganani udlala lemidlalo?                                           | Aamahora<br>Imizuzu                              | --<br>-- |
| G15                                                                                                                                                                                                                               | Ukucabanga ukuthi ukungazivocavoci kungaholela ekuphathweni yizifo ezithize?                      | Cha<br>Yebo<br><b>Uma kungucha welela ku H1</b>  | 0<br>1   |
| G16                                                                                                                                                                                                                               | Ungazibala izifo ezithize ezingadalwa ukungazivocavoci?                                           | Zibale                                           |          |
| G17                                                                                                                                                                                                                               | Usuke waxwayiswa udokotela/ umhlengikazi ukuba uzijwayeze ukuzivocavoca?                          | Cha<br>Yebo                                      | 0<br>1   |
| <b>UHLALA PHANSI</b>                                                                                                                                                                                                              |                                                                                                   |                                                  |          |
| Lemibuzo elandelayo imayelana nesikhathi esichithwa uhleli, kungaba yisekhaya ubuka umabona kude nebangani, ingaba kusebhansini/ imoto uyahamba, kanye nokuba sesikoleni uhleli ufunda, odwa loku akuthintani nesikhatsi sekulala |                                                                                                   |                                                  |          |
| G18                                                                                                                                                                                                                               | Singanani isikhathi osicithayo uhleli phansi osukwini?                                            | Amahora<br>Imizuzu                               | --<br>-- |

## H. UMFUTHO WEGAZI

| Imibuzo elandelayo imayelana nolwazi kanye nokwelashwa komfutho wegazi ophezulu |                                                                                                                    |                                                                                         |
|---------------------------------------------------------------------------------|--------------------------------------------------------------------------------------------------------------------|-----------------------------------------------------------------------------------------|
| Inombolo                                                                        | Imibuzo                                                                                                            | Izimpendulo                                                                             |
| H1                                                                              | Usuke wahlolwa ngudokotela ekuhleleka umfutho wegazi?                                                              | Cha 0<br>Yebo 1<br><b>Uma kunguCha welela ku H9</b>                                     |
| H2                                                                              | Usuke watshelwa udokotela noma abahlengikazi ukuthi unomfutho wegazi ophezulu ngokwedlulele                        | Cha 0<br>Yebo 1                                                                         |
| H3                                                                              | Watshelwa nini?                                                                                                    | Enyangeni endlule 1<br><br><b>Uma kungaphezu kwenyanga:</b><br>Bhala izinyanga iminyaka |
| H4                                                                              | Emavikini amabili edlule esuke wathatha imithi yokwe lapha isifo somfutho wegazi ophezi ngemiyalelo yadokotela?    | Cha 0<br>Yebo 1                                                                         |
| H5                                                                              | Wadla izihlobo ezingaki zemithi ukuze ulawule lokugula                                                             | Inombolo --                                                                             |
| H6                                                                              | Imithi uyisebenzisa njengemiyalelo?                                                                                | Cha 0<br>Yebo 1<br><b>Uma kungu yebo welela ku H6</b>                                   |
| H7                                                                              | yiziphi izizathu zokungayidli imithi?                                                                              | Zibale                                                                                  |
| H8                                                                              | Uyitholaphi imithi                                                                                                 | Esibhedlela sikahulumeni<br>Esibhedlela esizimele<br>Ikhemisi<br>Okunye                 |
| H9                                                                              | Igabe usuke waqhushiswa ngudokotela ukuba usebenzise indlela ethize yokudla ukuze ulawule umfutho wegazi ophezulu? | Cha 0<br>Yebo 1<br><b>Uma kungu cha welela kuH13</b>                                    |
| H10                                                                             | Ungazisho lezindlela/ zinhlobo zokudla                                                                             | Zibale                                                                                  |

|     |                                                                                       |                                                                                                     |                       |
|-----|---------------------------------------------------------------------------------------|-----------------------------------------------------------------------------------------------------|-----------------------|
| H11 | Uyayilandela imiyalelo yadokotela?                                                    | Cha<br>Yebo                                                                                         | 0<br>1                |
| H12 | Usake wabonana nenyanga mayelana nesifo semfutho wegazi ophezulu?                     | Cha<br>Yebo                                                                                         | 0<br>1                |
| H13 | Ingabe zikhona izimbiza zesintu oziphuzayo mayelana nokulapha lesifo?                 | Cha<br>Yebo                                                                                         | 0<br>1                |
| H14 | Abantu beminyanga emingakanani abase ungozini bokuba nesifo somfutho wegazi ophezulu? | 18 – 30 iminyaka<br>30 – 40 iminyaka<br>40 – 50 iminyaka<br>Abangaphezulu kwengu 50<br>Bonke abantu | 0<br>1<br>2<br>3<br>4 |

## J. UMLANDO WESIFO SIKASHUKELA

| Lemibuzo elandelayo iphathelele nomlando wakho noshukela |                                                                                                 |                                                                                 |                  |
|----------------------------------------------------------|-------------------------------------------------------------------------------------------------|---------------------------------------------------------------------------------|------------------|
| Inombolo                                                 | Imibuzo                                                                                         | Izimpendulo                                                                     |                  |
| J1                                                       | Usuke wahlolwa ngudokotela akuhlolela ushukela?                                                 | Cha<br>Yebo                                                                     | 0<br>1           |
| J2                                                       | Basake basho abahlengikazi noma odokotela ukuthi unoshukela ophezulu                            | Cha<br>Yebo                                                                     | 0<br>1           |
| J3                                                       | Bakwazisa nini?                                                                                 | Izinyanga<br>Iminyaka                                                           |                  |
| J4                                                       | Emavikini amabili edlule ikhona imithi yokulapha ushukela okuyisebenzisa ngemiyalelo yadokotela | Cha<br>Yebo                                                                     | 0<br>1           |
| J5                                                       | Uthatha izinhlobo ezingaki zemithi ukuze ulawule ushukela?                                      | Bhala inombolo                                                                  |                  |
| J6                                                       | Imithi uyidla ngedlela oyalelwe ngayo?                                                          | Cha<br>Yebo<br><b>Uma kungu yebo welela kuJ8</b>                                | 0<br>1           |
| J7                                                       | Yiziphi izizathu zokungadli imithi ngemiyalelo?                                                 | Zibale                                                                          |                  |
| J8                                                       | Uyitholaphi imithi?                                                                             | Emtholampilo kahlumeni<br>Emtholampilo Ozimele<br>-Ekhemisi elizimele<br>Okunye | 0<br>1<br>2<br>3 |
| J9                                                       | Ingabe wexwayiswa ngokushintsha indlela udla ngayo ngodokotela ngenxa yesifo sikashukela?       | Cha<br>Yebo<br><b>Uma kunguCha welela kuJ12</b>                                 | 0<br>1           |
| J10                                                      | Ungazibala lezindlela zokudla                                                                   | Zibale                                                                          |                  |
| J11                                                      | Uyailandela imiyalelo yadokotela                                                                | Cha<br>Yebo                                                                     | 0<br>1           |
| J12                                                      | Usuke waya enyangeni uyelashwa ushukela?                                                        | Cha<br>Yebo                                                                     | 0<br>1           |

|     |                                                                        |                         |   |
|-----|------------------------------------------------------------------------|-------------------------|---|
| J13 | Abantu beminyanga emingakanani abase ungozini bokuba nesifo soshukela? | 18 – 30 iminyaka        | 0 |
|     |                                                                        | 30 – 40 iminyaka        | 1 |
|     |                                                                        | 40 – 50 iminyaka        | 2 |
|     |                                                                        | Abangaphezulu kwengu 50 | 3 |
|     |                                                                        | Bonke abantu            | 4 |

### K. UMBONO NGOMZIMBA

| Ngizokubuza imibuzo ephatheleni nemizwa kanye nembono wakho mayelana nendlela imizimba ime ngayo. Uzongiphendula ngokubhala inombolo yesithombe lesihambisana nempendulo yakho. |                                                                           |                                        |
|---------------------------------------------------------------------------------------------------------------------------------------------------------------------------------|---------------------------------------------------------------------------|----------------------------------------|
| Inombolo                                                                                                                                                                        | Imibuzo                                                                   | Izimpendulo                            |
| K1                                                                                                                                                                              | Yisiphi isithombe ocabanga ukuthi siveza noma sifana nomzimba wakho       | Bhala isithombe osikhethile            |
| K2                                                                                                                                                                              | Uma ungashitsha isisindo somzimba wakho, ungashitshela kusiphi isithombe? | Bhala inombolo yesithombe losikhethile |
| K3                                                                                                                                                                              | Yiziphi izithombe ocabanga ukuthi ziveza imizimba yabantu baseNgwavuma?   | Bhala inombolo yesithombe osikhethile  |

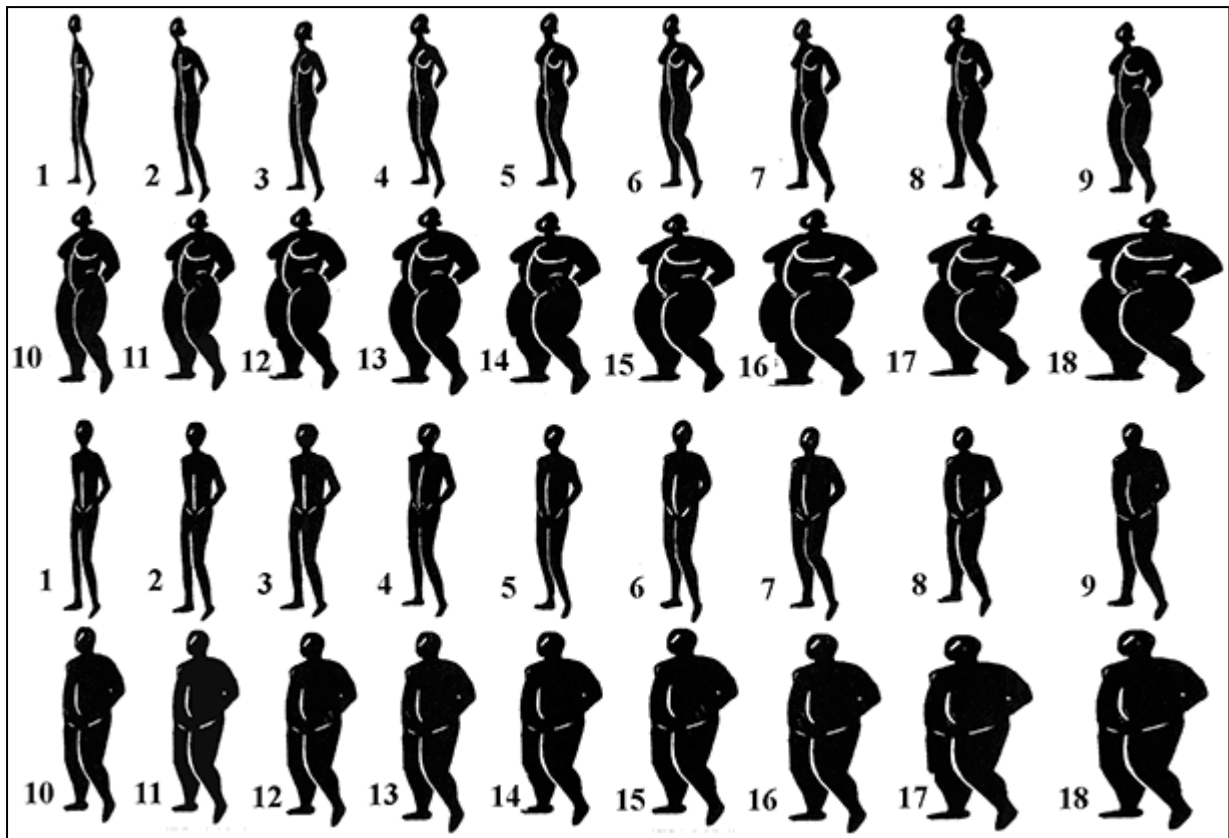

## L. ISIKALO

### UBUDE, ISISINDO, UKHALO

|    |          |    |
|----|----------|----|
| L1 | Ubude    | cm |
| L2 | Isisindo | kg |
| L3 | Ukhalo   | cm |

### Umfutho wegazi

|    |                    | I-Systolic | i-Dystolic |
|----|--------------------|------------|------------|
| L4 | Ukufunda okuqala   |            |            |
| L5 | Ukufunda kwesibili |            |            |

|    |                      |  |  |
|----|----------------------|--|--|
| L6 | Ukufunda kwesithathu |  |  |
|----|----------------------|--|--|

**Shukela wegazi**

|    |                            |
|----|----------------------------|
|    | i-hemoglobin Alc level (%) |
| L7 |                            |

Ngiyabonga kakhulu ngesikhathi sakho

Isikhathi sokuphela kocwaningo .....(Device time)
